# Supplementary material for: Leveraging UMLS-driven NLP to enhance identification of influenza predictors derived from electronic medical record data
Source: bioRxiv or medRxiv preprint supplement (doi:10.1101/2020.04.24.058982), 2020-04-25
Supplement: Supplementary file [file media-1.pdf]

| Symptom                       | ICD-9 Codes | ICD-10 Codes | UMLS Concept Codes |
|-------------------------------|-------------|--------------|--------------------|
|                               | 786.09      | R06.00       |                    |
| dyspnea (shortness of breath) | 786.05      | R06.02       | C0013404           |
| expectoration (cough)         | 786.2       | R05          | C0010200           |
|                               |             |              | C0015967           |
| fever                         | 780.6       | R50.9        | C0424755           |
|                               |             | R53.1        |                    |
|                               |             | R53.8        |                    |
|                               |             | R53.81       |                    |
| malaise / fatigue / weakness  | 780.79      | R53.83       | C0015672           |
|                               | 786.07      | R06.2        |                    |
|                               | 786.7       | R09.89       |                    |
| crepitations                  | 786.9       |              | C0034642           |
|                               |             |              | C0085593           |
|                               |             |              | C0424790           |
| chills / rigors / sweating    | 780.64      | R68.83       | C0038990           |
|                               |             | M79.1        |                    |
| myalgia                       | 729.1       | R52          | C0231528           |
| hemoptysis                    | 786.3       | R04.2        | C0019079           |
| confined to bed               | V49.84      | Z74.01       | not applicable     |
| headache                      | 784         | R51          | C0018681           |
|                               |             | J02          |                    |
|                               | 784.1       | J02.9        | C0031350           |
| pharyngitis / sore throat     | 462         | R07.0        | C0242429           |
|                               |             | R09.81       |                    |
|                               |             | R09.82       |                    |
|                               | 460         | J00          |                    |
| coryza / nasal congestion     | 478.19      | J34.89       | C0700148           |
| diarrhea                      | 787.91      | R19.7        | C0011991           |
|                               |             | R11.1        |                    |
|                               |             | R11.10       |                    |
|                               | 536.2       | R11.11       |                    |
|                               | 787.03      | R11.12       |                    |
| vomiting                      | 787.01      | R11.2        | C0042963           |
|                               | 787.02      | R11.0        |                    |
| nausea                        | 787.01      | R11.2        | C0027497           |
| lack of appetite              | 783         | R63.0        | C0003123           |
