# Supplementary material for: Leveraging UMLS-driven NLP to enhance identification of influenza predictors derived from electronic medical record data
Source: bioRxiv or medRxiv preprint supplement (doi:10.1101/2020.04.24.058982), 2020-04-25
Supplement: Supplementary file [file media-2.pdf]

---

**TestName**

Rapid Influenza B PCR Result

Seasonal H1N1 influenza A

Rapid Influenza A PCR Result

INFLUENZA SUBTYPING PANEL PCR

Influenza B PCR Screen

EPIDEMIC INFLUENZA PCR PANEL

Influenza A PCR Screen

INFLUENZA A; B AND RSV; RAPIC PCR

INFLUENZA A; B AND RSV; RAPID PCR

INFLUENZA A/B PCR (NWH)

INFLUENZA A/B & RSV BY PCR

Seasonal H3N2 influenza A

RAPID INFLUENZA A; B; RSV PCR

Influenza A Ct Value

RAPID INFLUENZA A; B; RSV PCR (NWH ONLY)

2009 swine H1N1 influenza A

Influenza A PCR Qual Result

Influenza A; Rapid

INFLUENZA A/B AND RSV PCR WITH SUBTYPING

INFLUENZA A;B;RSV\_RAPID PCR

RAPID INFLUENZA A AND B PCR

Influenza B PCR Qual Result

Influenza B Ct Value

Influenza B; Rapid

Influenza A/B PCR Result

INFLUENZA A/B AND RSV PANEL

ROUTINE INFLUENZA A/B & RSV

---
